# Supplementary material for: Species-Specific Glucose-6-Phosphatase Activity in the Small Intestine—Studies in Three Different Mammalian Models
Source: MDPI journal article supplement (doi:10.3390/ijms20205039), 2019-10-11
Supplement: s1 [file s1]

## Supplementary Material

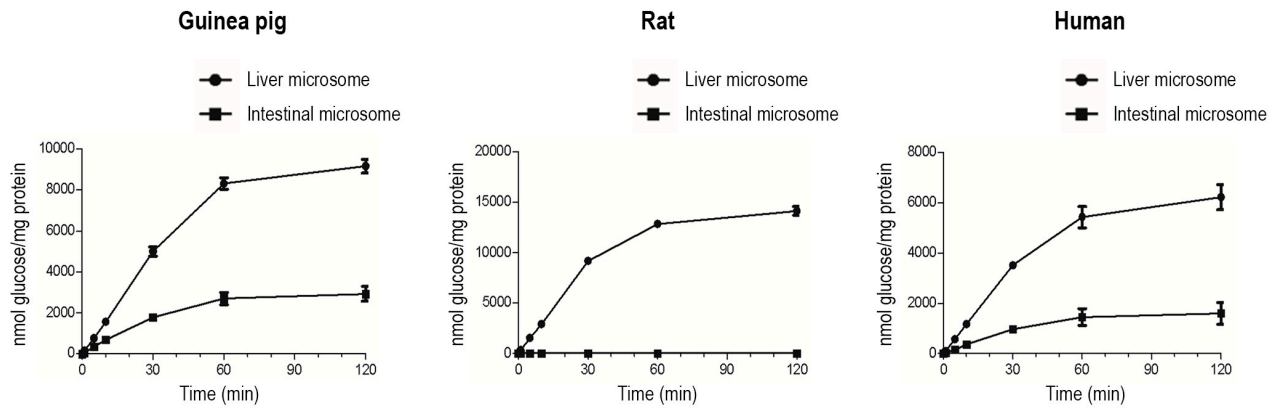

**Figure S1.** Kinetic analysis of glucose-6-phosphatase activity in guinea pig, rat and human liver and intestinal microsomes. Samples were washed 3 times and incubated at 37 °C in the presence of 10 mM glucose-6-phosphate substrate for 0, 1, 5, 10, 30, 60 and 120 mins. All experiments were performed in triplicates (n = 3) for all species. The figure shows the average activity  $\pm$  SD measured in these time points.

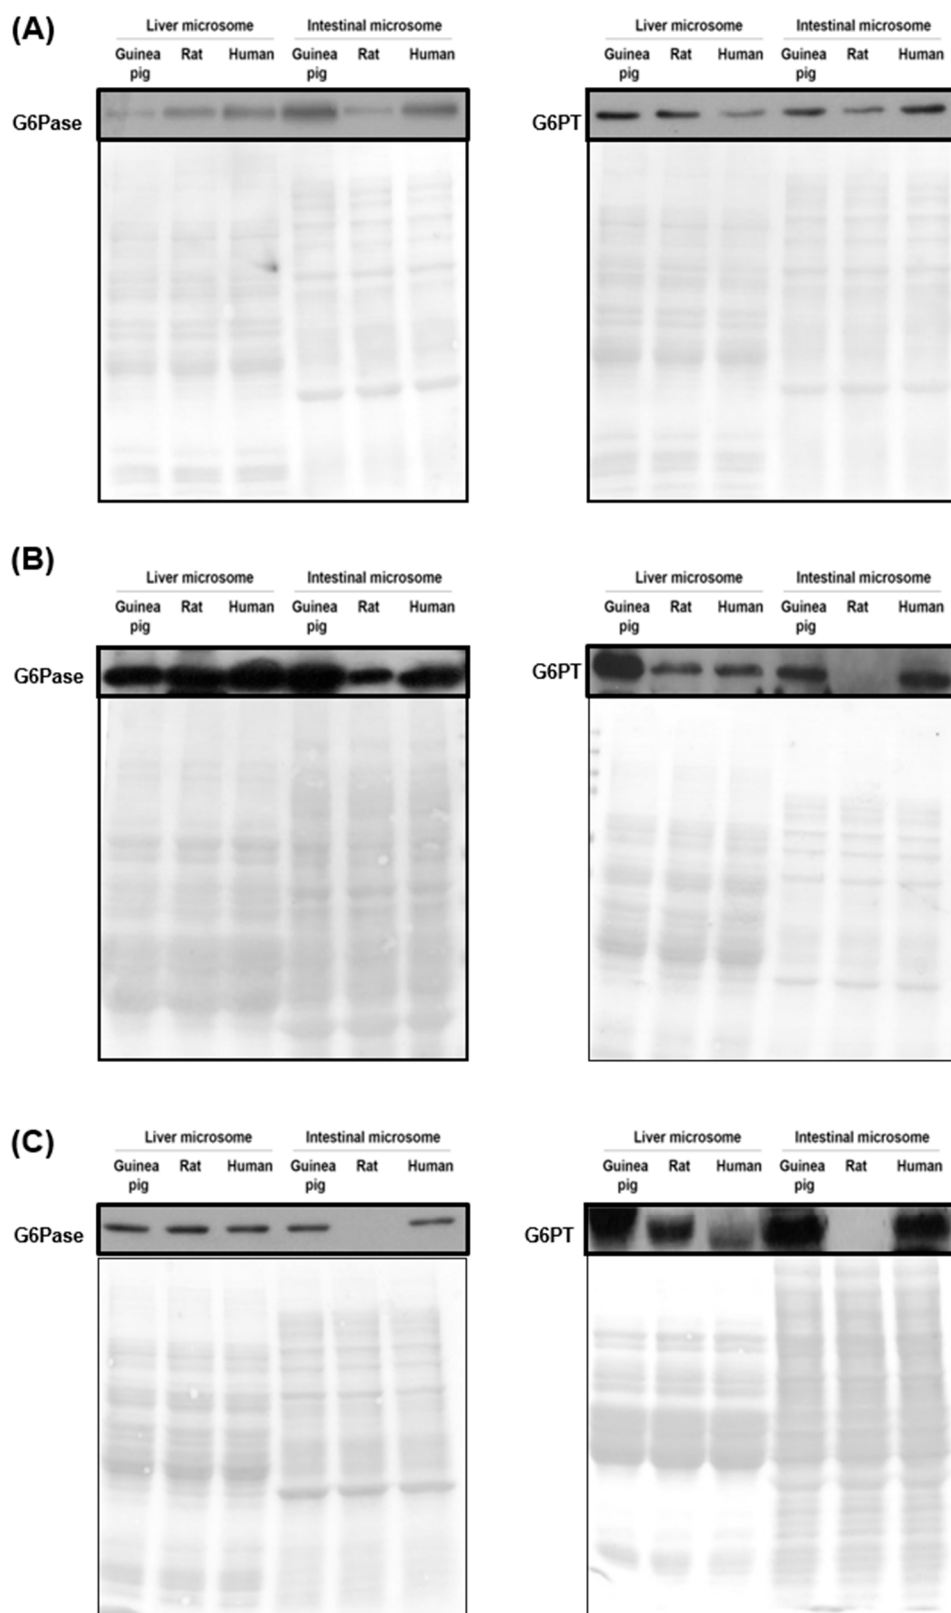

**Figure S2.** Analysis of protein expression of glucose-6-phosphatase (G6Pase) and glucose-6-phosphate transporter (G6PT) in guinea pig, rat and human liver and intestinal microsomes. Microsomal proteins from these species were prepared for Western blot analysis and experiments were repeated 3 times. Samples were immunoblotted with anti-glucose-6-phosphatase and anti-glucose-6-phosphate transporter antibodies. Ponceau staining was used as a loading control (density of bands of the examined protein was normalized to the corresponding lane of the Ponceau stained membrane). G6Pase, glucose-6-phosphatase; G6PT, glucose-6-phosphate transporter.

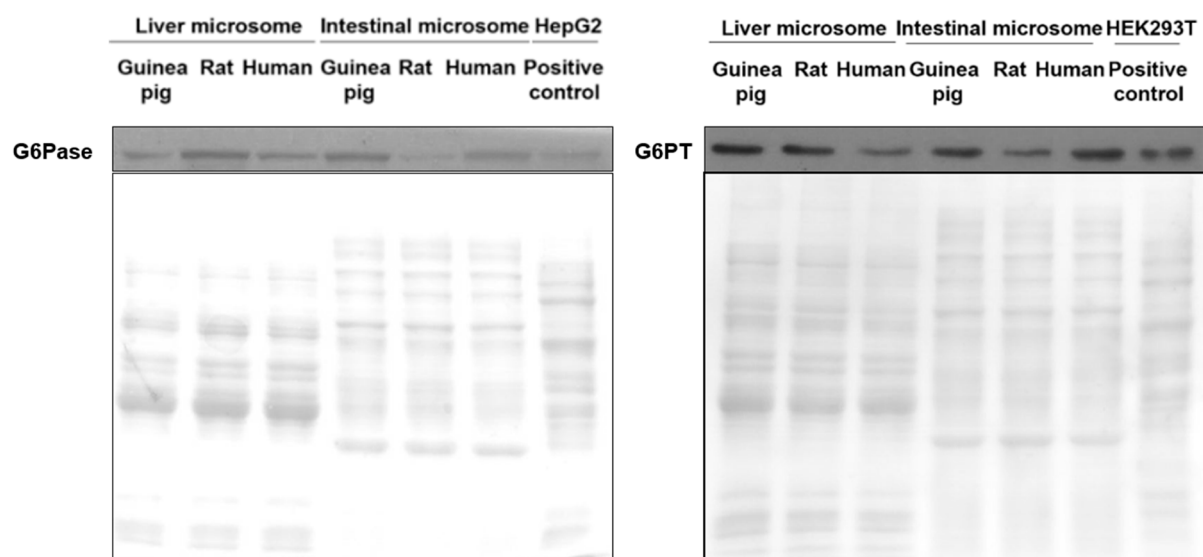

**Figure S3.** Analysis of protein expression of glucose-6-phosphatase (G6Pase) and glucose-6-phosphate transporter (G6PT) in guinea pig, rat and human liver and intestinal microsomes. Microsomal proteins from these species were prepared for Western blot analysis and experiments were repeated 3 times. Samples were immunoblotted with anti-glucose-6-phosphatase and anti-glucose-6-phosphate transporter antibodies. Ponceau staining was used as a loading control (density of bands of the examined protein was normalized to the corresponding lane of the Ponceau stained membrane). As a positive control, HepG2 cell lysates were used for G6Pase, and HEK293 cell lysates were used for G6PT. G6Pase, glucose-6-phosphatase; G6PT, glucose-6-phosphate transporter.
